1  
2  
3  
4  
5  
6  
7  
8  
9  
10  
11  
12  
13  
14  
15  
16  
17  
18  
19  
20  
21  
22  
23  
24  
25  
26  
27  
28  
29  
30  
31  
32  
33  
34  
35  
36  
37  
38  
39  
40  
41  
42  
43  
44  
45

## Noise correlations for faster and more robust learning

Matthew R. Nassar<sup>1,2</sup>, Apoorva Bhandari<sup>1,3</sup>

1. Robert J. & Nancy D. Carney Institute for Brain Science, Brown University, Providence RI 02912-1821, USA
2. Department of Neuroscience, Brown University, Providence RI 02912-1821, USA
3. Department of Cognitive, Linguistic, and Psychological Sciences, Providence RI, 02912-1821

### *Acknowledgements:*

We would like to thank Dan Scott, Josh Gold, Rex Liu, Michael Frank, Drew Linsley, Chris Moore and Jan Drugowitsch for helpful discussion. This work was funded by NIH grants F32MH102009 and R00AG054732 (MRN), NINDS R21NS108380 (AB). The funders had no role in study design, data collection and analysis, decision to publish or preparation of the manuscript.

### *Competing interests:*

The authors have no financial or non-financial conflicts of interest related to this work.

46

47 **Abstract:**

48

49 Distributed population codes are ubiquitous in the brain and pose a challenge to  
50 downstream neurons that must learn an appropriate readout. Here we explore  
51 the possibility that this learning problem is simplified through inductive biases  
52 implemented by stimulus-independent noise correlations that constrain learning  
53 to task-relevant dimensions. We test this idea in a set of neural networks that  
54 learn to perform a perceptual discrimination task. Correlations among similarly  
55 tuned units were manipulated independently of overall population signal-to-noise  
56 ratio in order to test how the format of stored information affects learning. Higher  
57 noise correlations among similarly tuned units led to faster and more robust  
58 learning, favoring homogenous weights assigned to neurons within a functionally  
59 similar pool, and could emerge through Hebbian learning. When multiple  
60 discriminations were learned simultaneously, noise correlations across relevant  
61 feature dimensions sped learning whereas those across irrelevant feature  
62 dimensions slowed it. Our results complement existing theory on noise  
63 correlations by demonstrating that when such correlations are produced without  
64 degradation of signal-to-noise ratio, they can improve readout learning by  
65 constraining it to appropriate dimensions.

66

67

68 **Introduction:**

69

70 The brain represents information using distributed population codes in which  
71 particular feature values are encoded by large numbers of neurons. One  
72 advantage of such codes is that a pooled readout across many neurons can  
73 effectively reduce the impact of stimulus-independent variability (noise) in the  
74 firing of individual neurons (Pouget et al., 2000). However, the extent to which  
75 this benefit can be employed in practice is constrained by noise correlations, or  
76 the degree to which stimulus-independent variability is shared across neurons in  
77 the population (Averbeck et al., 2006). In particular, positive noise correlations  
78 between neurons that share the same stimulus tuning can reduce the amount of  
79 decodable information in the neural population (Averbeck et al, 2006; Moreno-  
80 Bote et al., 2014; Hu et al., 2014). Despite their detrimental effect on encoding,  
81 noise correlations of this type are reliably observed, even after years of training  
82 on perceptual tasks (Cohen and Kohn, 2011). Furthermore, noise correlations  
83 between neurons are dynamically enhanced under conditions where two neurons  
84 provide evidence for the same response in a perceptual categorization task  
85 (Cohen and Newsome, 2008), raising questions about whether they might serve  
86 a function rather than simply reflecting a suboptimal encoding strategy.

87

88 At the same time, learning to effectively read out a distributed code also poses a  
89 significant challenge. Learning the appropriate weights for potentially tens of

90 thousands of neurons in a low signal-to-noise regime is a difficult, high-  
91 dimensional problem, requiring a very large number of learning trials and  
92 entailing considerable risk of “over fitting” to specific patterns of noise across the  
93 neural populations encountered during learning trials. Nonetheless, people and  
94 animals can rapidly learn to perform perceptual discrimination tasks, albeit with  
95 performance that does not approach theoretically achievable levels (Hawkey et  
96 al., 2004; Stringer et al., 2019). In comparison, deep neural networks capable of  
97 achieving human level performance typically require a far greater number of  
98 learning trials than would be required by humans and other animals (Tsvividis et  
99 al., 2017). This raises the question of how brains might implement inductive  
100 biases to enable efficient learning in high dimensional spaces.

101

102 Here we address open questions about noise correlations and learning by  
103 considering the possibility that noise correlations facilitate faster learning.  
104 Specifically, we propose that noise correlations aligned to task relevant  
105 dimensions could reduce the effective dimensionality of learning problems,  
106 thereby making them easier to solve. For example, perceptual stimuli often  
107 contain a large number of features that may be irrelevant to a given  
108 categorization. At the level of a neural population, individual neurons may differ in  
109 the degree to which they encode task irrelevant information, thus making the  
110 learning problem more difficult. In principle, noise correlations in the relevant  
111 dimension could reduce the effects of this variability on learned readout. Such an  
112 explanation would be consistent with computational analyses of Hebbian learning  
113 rules (Oja, 1982), which can both facilitate faster and more robust learning  
114 (Krotov and Hopfield, 2019), and in turn may induce noise correlations. We  
115 propose that faster learning of an approximate readout is made possible through  
116 low dimensional representations that share both signal and noise across a large  
117 neural population. In particular, we hypothesize that representations  
118 characterized by enhanced noise correlations among similarly tuned neurons can  
119 improve learning by focusing adjustments of the readout onto task relevant  
120 dimensions.

121

122 We explore this possibility using neural network models of a two-alternative  
123 forced choice perceptual discrimination task in which the correlation among  
124 similarly tuned neurons can be manipulated independently of the overall  
125 population signal-to-noise ratio. Within this framework, noise correlations, which  
126 can be learned through Hebbian mechanisms, speed learning by forcing learned  
127 weights to be similar across pools of similarly tuned neurons, thereby ensuring  
128 learning occurs over the most task relevant dimension. We extend our framework  
129 to a cued multidimensional discrimination task and show that dynamic noise  
130 correlations similar to those observed in vivo (Cohen and Newsome, 2008),  
131 speed learning by constraining weight updates to the relevant feature space. Our  
132 results demonstrate that when information is extrinsically limited, noise

133 correlations can make learning faster and more robust by controlling the  
134 dimensions over which learning occurs.

135

136

137 **Methods:**

138 Our goal was to understand the computational principles through which  
139 correlations in the activity of similarly tuned neurons affect the speed with which  
140 downstream neurons could learn an effective readout. Previous work has  
141 demonstrated that manipulating noise correlations while maintaining a fixed  
142 variance in the firing rates of individual neurons leads to changes in the  
143 theoretical encoding capacity of a neural population (Averbeck et al., 2006;  
144 Moreno-Bote et al., 2014). To minimize the potential impact of such encoding  
145 differences, we took a different approach; rather than setting the variance of  
146 individual neurons in our population to a fixed value, we set the signal-to-noise  
147 ratio of our population to a fixed value. Thus, our approach does not ask how  
148 maximum information can be packed into a given neural population's activity, but  
149 rather how the strategy for packing a *fixed* amount of information in a population  
150 affects the speed with which an appropriate readout of that information can be  
151 learned. We implement this approach in three neural networks described in more  
152 detail below.

153 *Learning readout in perceptual learning task*

154 Simulations and analyses for a simple perceptual discrimination task were  
155 performed with a simplified and statistically tractable two-layer feed-forward  
156 neural network (figure 3A). The input layer consisted of two pools of 100 units  
157 that were each “tuned” to one of two motion directions (left, right). On each trial  
158 normalized firing rates for the neural population were drawn from a multivariate  
159 normal distribution that was specified by a vector of stimulus-dependent mean  
160 firing rates (signal: +1 for preferred stimulus, -1 for non-preferred stimulus) and a  
161 covariance matrix. All elements of the covariance matrix corresponding to  
162 covariance between units that were “tuned” to different stimuli were set to zero.  
163 The key manipulation was to systematically vary the magnitude of diagonal  
164 covariance components (eg. noise in the firing of individual units) and the “same  
165 pool” covariance elements (eg. shared noise across identically tuned neurons)  
166 while maintaining a fixed level of variance in the summed population response for  
167 each pool:

$$\sigma_{pool}^2 = n\sigma_{unit}^2 + n(n-1)Cov(\text{within pool}) \quad Eq. 1$$

168 Where  $\sigma_{pool}^2$  is the variance on the sum of normalized firing rates from neurons  
169 within a given pool,  $n$  is the number of units in the pool and the within pool  
170 covariance ( $Cov(\text{within pool})$ ) specifies the covariance of pairs of units

171 belonging to the same pool. The signal-to-noise ratio ( $\text{signal}/\sigma_{pool}^2$ ) for each pool  
172 was fixed to one. Given this constraint, the fraction of noise that was shared  
173 across neurons within the same pool was manipulated as follows:

174

$$\sigma_{unit}^2 = \frac{\sigma_{pool}^2}{n + n(n-1)\phi} \quad Eq. 2$$

175

176

$$Cov(\text{within pool}) = \phi\sigma_{unit}^2 \quad Eq. 3$$

177

178 Where  $\phi$  reflects the fraction of noise that is correlated across units, which we  
179 refer to in the text as noise correlations. Noise correlations ( $\phi$ ) were manipulated  
180 across values ranging from 0 to 0.2 for simulations. Note that, since  $\phi$  appears in  
181 the denominator of equation 2, adding noise correlations while sustaining a fixed  
182 population signal-to-noise ratio leads to lower variance in the firing rates of single  
183 neurons, differing from previous theoretical assumptions (compare figure 2a&b).

184

185 The input layer of the neural network was fully connected to an output layer  
186 composed of two output units representing left and right responses. Output units  
187 were activated on a given trial according to a weighted function of their inputs:

188

189

$$F_{output} = wF_{input} \quad Eq. 4$$

190

191 Where  $F_{output}$  is a vector of firing rates of output units,  $F_{input}$  is a vector of firing  
192 rates of the input units, and  $w$  is the weight matrix. Firing of an individual output  
193 unit can also be written as a weighted sum over input unit activity:

194

$$F_j = \sum_{i=1}^{200} w_{i,j} F_i \quad Eq. 5$$

195 where  $F_j$  reflects the firing of the  $j^{\text{th}}$  output unit,  $F_i$  reflects the firing of the  $i^{\text{th}}$  input  
196 unit, and  $w_{i,j}$  reflects the weight of the connection between the  $i^{\text{th}}$  input unit and

197 the  $j^{\text{th}}$  output unit. Actions were selected as a softmax function of output firing  
198 rates:  
199

$$p(A_j) = \frac{e^{\beta F_j}}{\sum_k e^{\beta F_k}} \quad \text{Eq. 6}$$

200 where  $\beta$  is an inverse temperature, which was set to a relatively deterministic  
201 value (10000). Learning was implemented through reinforcement learning of  
202 weights to the selected output neuron (subscripted  $j$  below):  
203

$$\Delta w_{i,j} = \alpha \delta F_i \quad \text{Eq. 7}$$

204 Where  $F_i$  is the normalized firing rate of the  $i^{\text{th}}$  input neuron,  $\delta$  is the reward  
205 prediction error experienced on a given trial [+0.5 for correct trials and -0.5 for  
206 error trials], and  $\alpha$  is a learning rate (set to 0.0001 for simulations in figure 2). The  
207 network was trained to correctly identify two stimuli (each of which was preferred  
208 by a single pool of input neurons) over 100 trials (the last 20 trials of which were  
209 considered testing). Simulations were repeated 1000 times for each level of  $\phi$   
210 and performance measures were averaged across all repetitions. Mean accuracy  
211 per trial across all simulations was convolved with a Gaussian kernel (standard  
212 deviation = 0.5 trials) for plotting in figure 2b. Mean accuracy across the final 20  
213 trials was used as a measure of final accuracy (figure 2e). Statistics on model  
214 performance were computed as Pearson correlations between noise correlations  
215  $\phi$  and performance measures across all simulations and repetitions.  
216

### 217 *Hebbian learning of noise correlations in three layer network*

218  
219 We extended the two-layer feed-forward architecture described above to include  
220 a third hidden layer in order to test whether Hebbian learning could facilitate  
221 production of noise correlations among similarly tuned neurons (figure 4A). The  
222 input layer was fully connected to the hidden layer, and each layer contained 200  
223 neurons. In the input layer, neurons were tuned (100 leftward, 100 rightward) as  
224 described above, with  $\phi$  set to zero (eg. no noise correlations). Weights to the  
225 hidden layer were initialized to favor one-to-one connections between input layer  
226 units and hidden layer units by adding a small normal random weight perturbation  
227 (mean=0, standard deviation = 0.01) to an identity matrix. During learning,  
228 weights between the input and hidden layer were adjusted according to a  
229 normalized Hebbian learning rule:  
230

$$\Delta W = \alpha_{hebb} \mathbf{F}'_1 \mathbf{F}_2 \quad \text{Eq. 8}$$

231  
232 Where  $F'_1$  is a normalized vector of firing rates corresponding to the input layer  
233 and  $F_2$  is a normalized vector of firing rates corresponding to the hidden layer  
234 units. The learning rate for Hebbian plasticity ( $\alpha_{hebb}$ ) was set to 0.00005 for  
235 simulations in figure 4. The model was “trained” over 100 trials in the same  
236 perceptual discrimination task described above and an additional 100 trials of the  
237 task were completed to measure emergent noise correlations in the hidden layer.  
238 Noise correlations were measured by regressing out variance attributable to the  
239 stimulus on each trial, and then computing the Pearson correlation of residual  
240 firing rate across each pair of neurons for the 100 testing trials (figure 4B&C).  
241

#### 242 *Learning readout in multiple discrimination task*

243 In order to test the impact of contextual noise correlations on learning (Cohen  
244 and Newsome, 2008), the perceptual discrimination task was extended to include  
245 two dimensions and two interleaved trial types: one in which an up/down  
246 discrimination was performed (vertical), and one in which a right/left  
247 discrimination was performed (horizontal). Each trial contained motion on the  
248 vertical axis (up or down) and on the horizontal axis (left or right), but only one of  
249 these motion axes was relevant on each trial as indicated by a cue.

250  
251 In order to model this task we extended our two-layer feed-forward network to  
252 include 4 populations of input units, 4 output units, and 2 task units (figure 5A).  
253 Each population of 100 input units encoded a conjunction of the movement  
254 directions (up-right, up-left, down-right, down-left). On each trial, the mean firing  
255 rate of each input unit population was determined according to their tuning  
256 preferences:

257  
258

$$\mu = V + H \quad Eq. 9$$

259  
260 Where V was +1/-1 for trials with the preferred/anti-preferred vertical motion  
261 direction H was +1/-1 for trials with the preferred/anti-preferred horizontal motion  
262 direction. Firing rates for individual neurons were sampled from a multivariate  
263 Gaussian distribution with mean  $\mu$  and a covariance matrix that depended on trial  
264 type (vertical versus horizontal) and the level of same pool, relevant pool, and  
265 irrelevant pool correlations.

266  
267 In order to create a covariance matrix, we stipulated a desired standard error of  
268 the mean for summed population activity (SEM=20 for simulations in figure 5)  
269 and determined the summed population variance that would correspond to that  
270 value ( $\sigma_{pool}^2$ ). We then determined the variance on individual neurons that would  
271 yield this population response under a given noise correlation profile as follows:



272

$$\sigma_{unit}^2 = \frac{\sigma_{pool}^2}{n + n(n-1)\phi_{same} + n^2\phi_{relevant} - n^2\phi_{irrelevant}} \quad Eq. 10$$

273

274 Where  $\phi_{same}$  is the level of same pool correlations (range: 0-0.2 in our  
275 simulations),  $\phi_{relevant}$  is the level of relevant pool correlations (range: 0-0.2 in our  
276 simulations),  $\phi_{irrelevant}$  is the level of irrelevant pool correlations (range: 0-0.2 in  
277 our simulations. Note that increasing the same pool or in pool correlations  
278 reduces the overall variance in order to preserve the same level of variance on  
279 the task relevant dimension in the population response, but that increasing  
280 irrelevant pool correlations has the opposite effect. Covariance elements of the  
281 covariance matrix were determined as follows:  
282

$$Cov(same\ pool) = \phi_{same}\sigma_{unit}^2 \quad Eq. 11$$

$$Cov(relevant\ pool) = \phi_{relevant}\sigma_{unit}^2 \quad Eq. 12$$

$$Cov(irrelevant\ pool) = \phi_{irrelevant}\sigma_{unit}^2 \quad Eq. 13$$

283 Variance and covariance values above were used to construct a covariance  
284 matrix for each trial type (vertical/horizontal) as depicted in figure 1.



### Covariance matrix: vertical trials

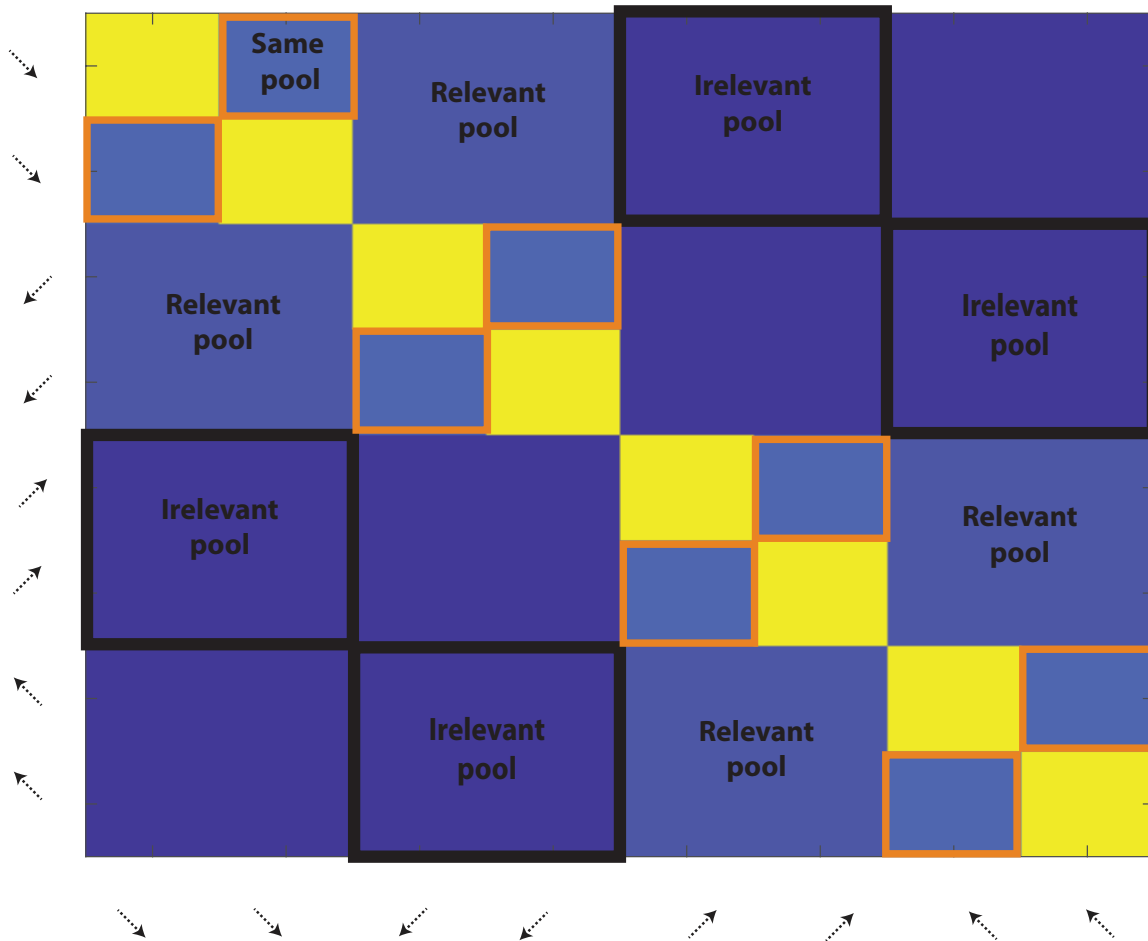

285  
 286 **Figure 1: Schematic of covariance matrix for two-dimensional motion discrimination task.**  
 287 Same pool correlations are controlled by covariance elements between neurons with identical  
 288 tuning (orange boxes). Relevant pool correlations are controlled by covariance elements between  
 289 neurons that are similarly tuned to the task-relevant feature. Task irrelevant correlations are  
 290 controlled by covariance elements between neurons that are similarly tuned to the task-irrelevant  
 291 feature. The covariance matrix shown here is for a vertical trial – on a horizontal trial the irrelevant  
 292 pool and relevant pool locations would be reversed. Covariance elements for pairs of neurons  
 293 that differed in tuning on both dimensions were set to zero. Each input population has been  
 294 depicted as two units here for presentation purposes. Background color reflects the case where  
 295 same pool correlations = 0.2 and relevant pool correlations = 0.1.

296

297

298 Output units corresponded to the four possible task responses (up, down, left,  
 299 right) and were activated according to a weighted sum of their inputs as  
 300 described previously. Task units were modeled as containing perfect information  
 301 about the task cue (vertical versus horizontal) and were modeled to completely  
 302 inhibit the responses of the irrelevant output units. Decisions were made on each  
 303 trial by selecting the output unit with the highest activity level. Weights to chosen  
 304 output unit were updated using the same reinforcement learning procedure  
 305 described in the two alternative perceptual learning task.

306

307

308 **Results:**

309

310 We examine how noise correlations affect learning in a simplified neural network  
311 where the appropriate readout of hundreds of weakly tuned units is learned over  
312 time through reinforcement. In order to isolate the effects of noise correlations on  
313 learning, rather than their effects on other factors such as representational  
314 capacity, we consider population encoding schemes at the input layer that can be  
315 constrained to a fixed signal-to-noise ratio. This assumption differs from previous  
316 work on noise correlations where the *variance* of the neural population is  
317 assumed to be fixed and covariance is changed to produce noise correlations,  
318 thereby affecting the representational capacity of the population (figure 2A;  
319 (Averbeck et al., 2006; Moreno-Bote et al., 2014)). Under our assumptions, a  
320 fixed signal-to-noise ratio can be achieved for any level of by scaling the variance  
321 (figure 2B; equations 1-3), or, alternately scaling the magnitude of the signal (not  
322 shown). While we do not discount the degree to which noise correlations affect  
323 the encoding potential of neural populations, we believe that in many cases the  
324 relevant information is limited by extrinsic factors (eg. the stimulus itself, or  
325 upstream neural populations providing input (Beck et al., 2012; Kanitscheider et  
326 al., 2015)). Under such conditions, reducing noise correlations can increase  
327 information only until it saturates because all of the available incoming  
328 information is encoded. Beyond that, increasing encoding potential is not  
329 possible as it would be tantamount to the population “creating new information”  
330 that was not communicated by inputs to the population. Therefore, our framework  
331 can be thought of as testing how best to format limited available information in a  
332 neural population in order to ensure that an acceptable readout can be rapidly  
333 and robustly learned.

334

335 We propose that within this framework, noise correlations of the form that have  
336 previously been shown to limit encoding are beneficial because they constrain  
337 learning to occur over the most relevant dimensions. In general, a linear readout  
338 can be thought of as hyperplane serving as a classification boundary in an N  
339 dimensional space, where N reflects the number of neurons in a population.  
340 Learning in such a framework involves adjustments of the hyperplane to minimize  
341 classification errors. The most useful adjustments are in the dimension that best  
342 discriminates signal from noise (central arrows in figure 2C&D), but adjustments  
343 may also occur in dimensions orthogonal to the relevant one (such as “twisting”  
344 of the hyperplane depicted by curved arrows in figure 2C&D) that could  
345 potentially impair performance, or slow down learning. Our motivating hypothesis  
346 is that by focusing population activity into the task relevant dimension, noise  
347 correlations can increase the fraction of hyperplane adjustments that occur in the  
348 task relevant dimension (figure 2D), thus reducing the effective dimensionality of  
349 readout learning.

350  
351  
352  
353

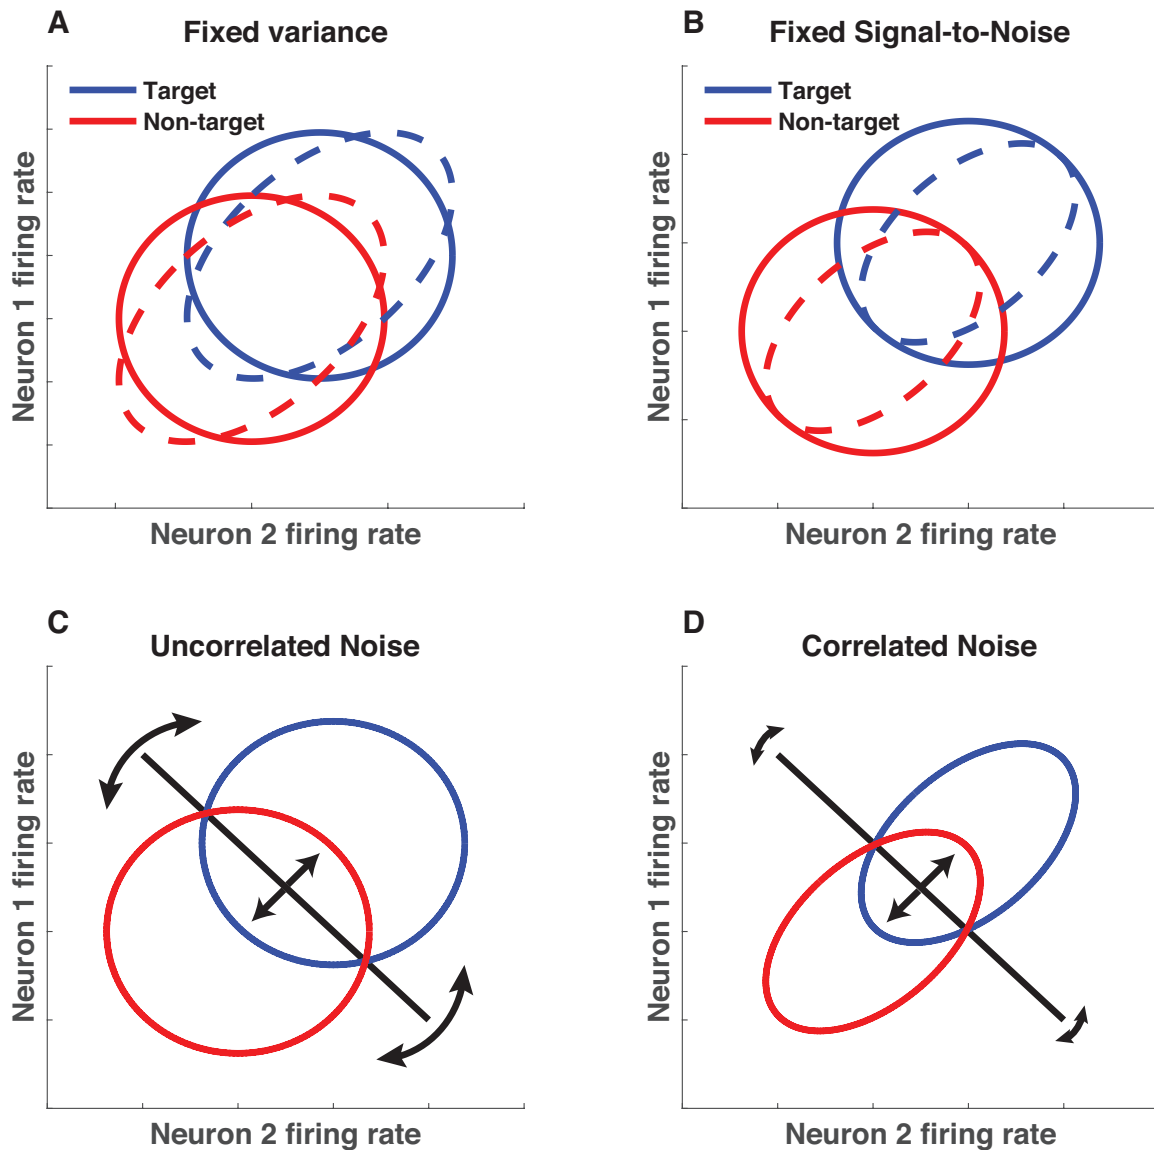

354  
355  
356  
357  
358  
359  
360  
361  
362  
363  
364  
365

**Figure 2: Modeling noise correlations in under extrinsic constraint on signal-to-noise ratio.** **A)** Previous work has modeled noise correlations by assuming that population variance is fixed and that covariance is manipulated to produce noise correlations. Under such assumptions, the firing rate of two similarly tuned neurons is plotted in the absence (solid) or presence (dotted) of information-limiting noise correlations. **B)** Here we assume that the signal-to-noise ratio of the neural population is limited to a fixed value such that noise correlations between similarly tuned neurons do not affect theoretical performance. Thus, the percent overlap of blue (target) and red (non-target) activity profiles does not differ in the presence (dotted) or absence (solid) of noise correlations. **C&D)** Under this assumption, noise correlations among similarly tuned neurons could compress the population activity to a plane orthogonal to the optimal decision boundary,

366 thereby minimizing boundary adjustments in irrelevant dimensions (**C**) and maximizing boundary  
367 adjustments on relevant ones (**D**).

368

369

370 In order to test this hypothesis, we constructed a fully connected two-layer feed-  
371 forward neural network in which input layer units responded to one of two  
372 stimulus categories (pool 1 & pool 2) and each output unit produced a response  
373 consistent with a category perception (left/right units in figure 3A). On each trial,  
374 the network was presented with one stimulus at random, and input firing for each  
375 pool was drawn from a multivariate Gaussian with a covariance that was  
376 manipulated while preserving the population signal-to-noise ratio. Output units  
377 were activated according to a weighted average of inputs and a response was  
378 selected according to output unit activations. On each trial, weights to the  
379 selected action were adjusted according to a reinforcement learning rule that  
380 strengthened connections that facilitated a rewarded action and weakened  
381 connections that facilitated an unrewarded action (Law and Gold, 2009).

382

383 Noise correlations led to faster and more robust learning of the appropriate  
384 stimulus-response mapping. All neural networks learned to perform the requisite  
385 discrimination, but neural networks that employed correlations among similarly  
386 tuned neurons learned more rapidly (figure 3B). After learning, networks that  
387 employed such noise correlations assigned more homogenous weights to input  
388 units of a given pool than did networks that lacked noise correlations (compare  
389 figure 3C&D). This led to better trained-task performance (figure 3E; Pearson  
390 correlation between noise correlations and test performance:  $R = 0.29$ ,  $p < 10e-$   
391  $50$ ) and greater robustness to adversarial noise profiles (figure 3F;  $R = 0.81$ ,  $p <$   
392  $10e-50$ ) in the networks that employed noise correlations. Critically, these  
393 learning advantages emerged despite the fact that optimal readout of all  
394 networks achieved similar levels of performance and robustness (figure 3E&F,  
395 compare optimal readout across conditions).

396

397

398

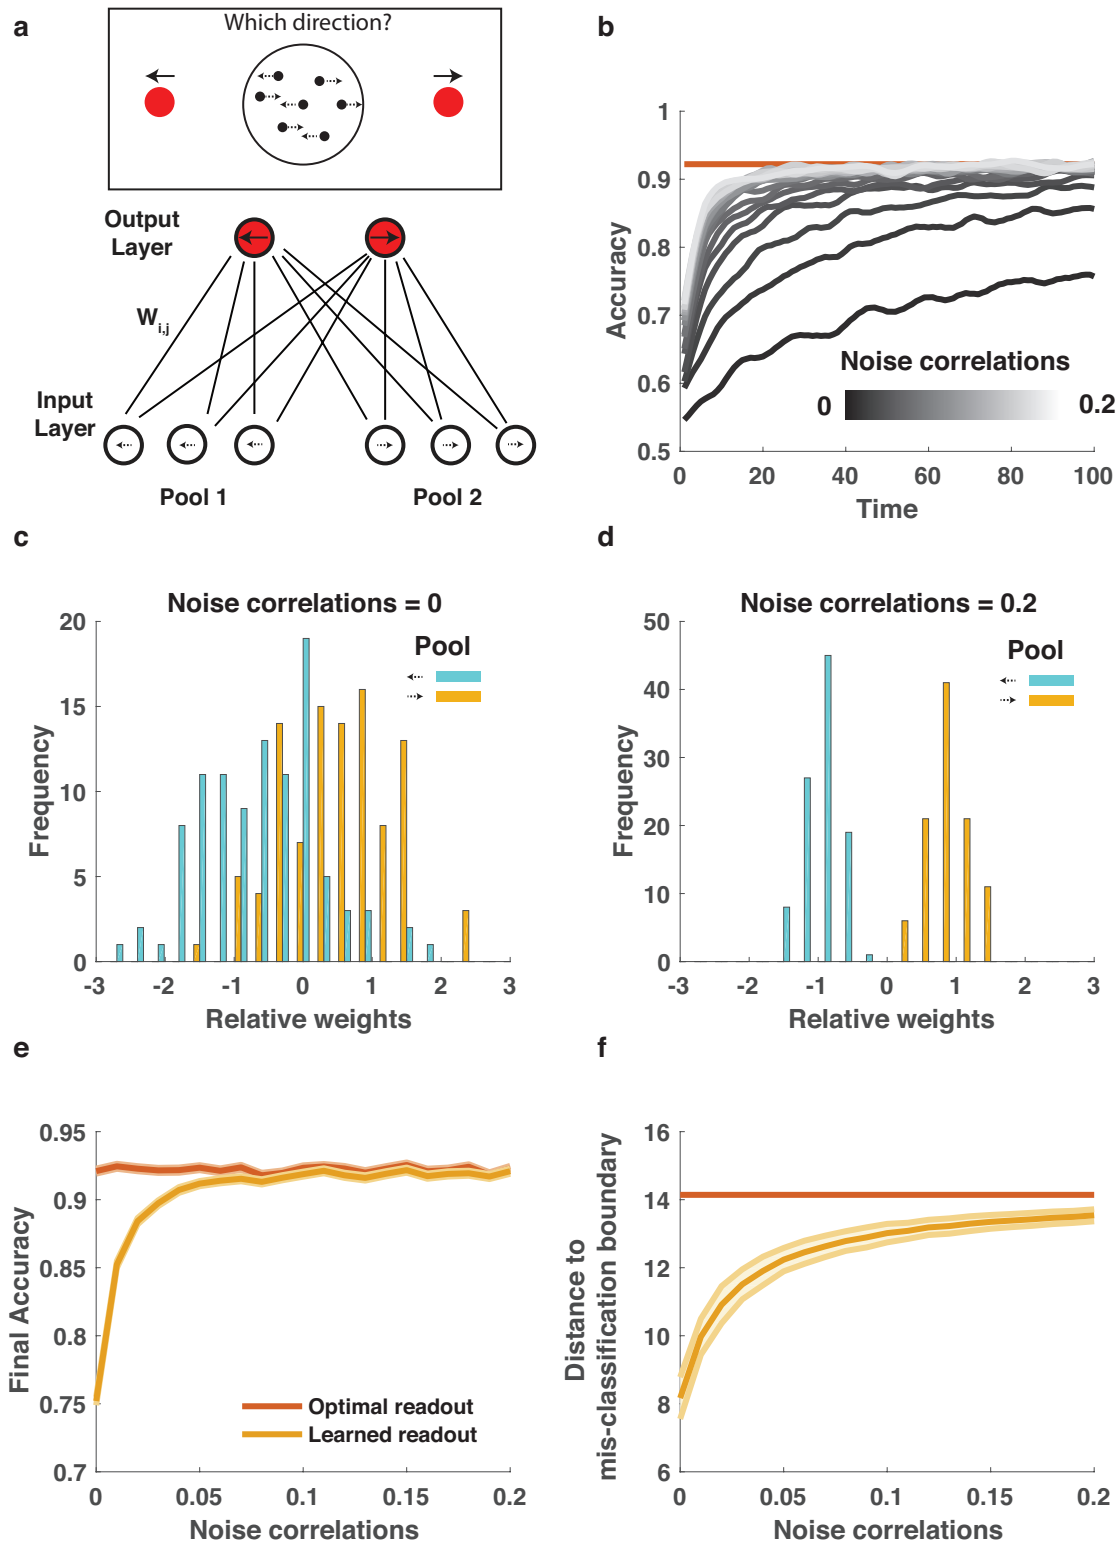

399  
 400  
 401  
 402  
 403  
 404

**Figure 3: Correlated noise within similarly tuned populations leads to faster and more robust learning of a perceptual discrimination. A)** A two-layer feed-forward neural network was designed to solve a two alternative forced choice motion discrimination task at or near

405 perceptual threshold. Input layer contains two pools of neurons that provide evidence for alternate  
406 percepts (eg. leftward motion versus rightward motion) and output neurons encode alternate  
407 courses of actions (eg. saccade left versus saccade right). Layers are fully connected with  
408 weights randomized to small values and adjusted after each trial according to rewards (see  
409 methods). **B)** Average learning curves for neural network models in which population signal-to-  
410 noise ratio in pools 1 and 2 were fixed, but noise correlations (grayscale) were allowed to vary  
411 from small (dark) to large (light) values. **C&D)** Weight differences (left output – right output) for  
412 each input unit (color coded according to pool) after 100 timesteps of learning for low (**C**) and high  
413 (**D**) noise correlations. **E)** Accuracy in the last 20 training trials is plotted as a function of noise  
414 correlations for learned readouts (orange) and optimal readout (red). Lines/shading reflect  
415 Mean/SEM. **F)** The shortest distance, in terms of neural activation, required to take the mean  
416 input for a given category (eg. left or right) to the boundary that would result in misclassification is  
417 plotted for the final learned (orange) and optimal (red) weights for each noise correlation condition  
418 (abscissa). Lines/shading reflect Mean/SEM.

419  
420  
421

422 Given that noise correlations implemented in our previous simulation, like those  
423 observed in the brain, depended on the tuning of individual units, we tested  
424 whether such noise correlations might be produced via Hebbian plasticity.  
425 Specifically, we considered an extension of our neural network in which an  
426 additional intermediate layer is included between input and output neurons (figure  
427 4a). Input units were again divided into two pools that differed in their encoding,  
428 but variability was uncorrelated across neurons within a given pool. Connections  
429 between the input layer and intermediate layer were initialized such that each  
430 input unit strongly activated one intermediate layer unit, and shaped over time  
431 using a Hebbian learning rule that strengthened connections between co-  
432 activated neuron pairs. Despite the lack of noise correlations in the input layer of  
433 this network (figure 4b; mean[std] in pool residual correlation = 0.0015[0.10]),  
434 neurons in the intermediate layer developed tuning-specific noise correlations of  
435 the form that were beneficial for learning in the previous simulations (figure 4c;  
436 mean[std] in pool residual correlation = 0.55[0.07]; *t*-test on difference from input  
437 layer correlations  $t = 443$ ,  $dof = 19800$ ,  $p < 10e-50$ ).

438  
439  
440  
441  
442  
443

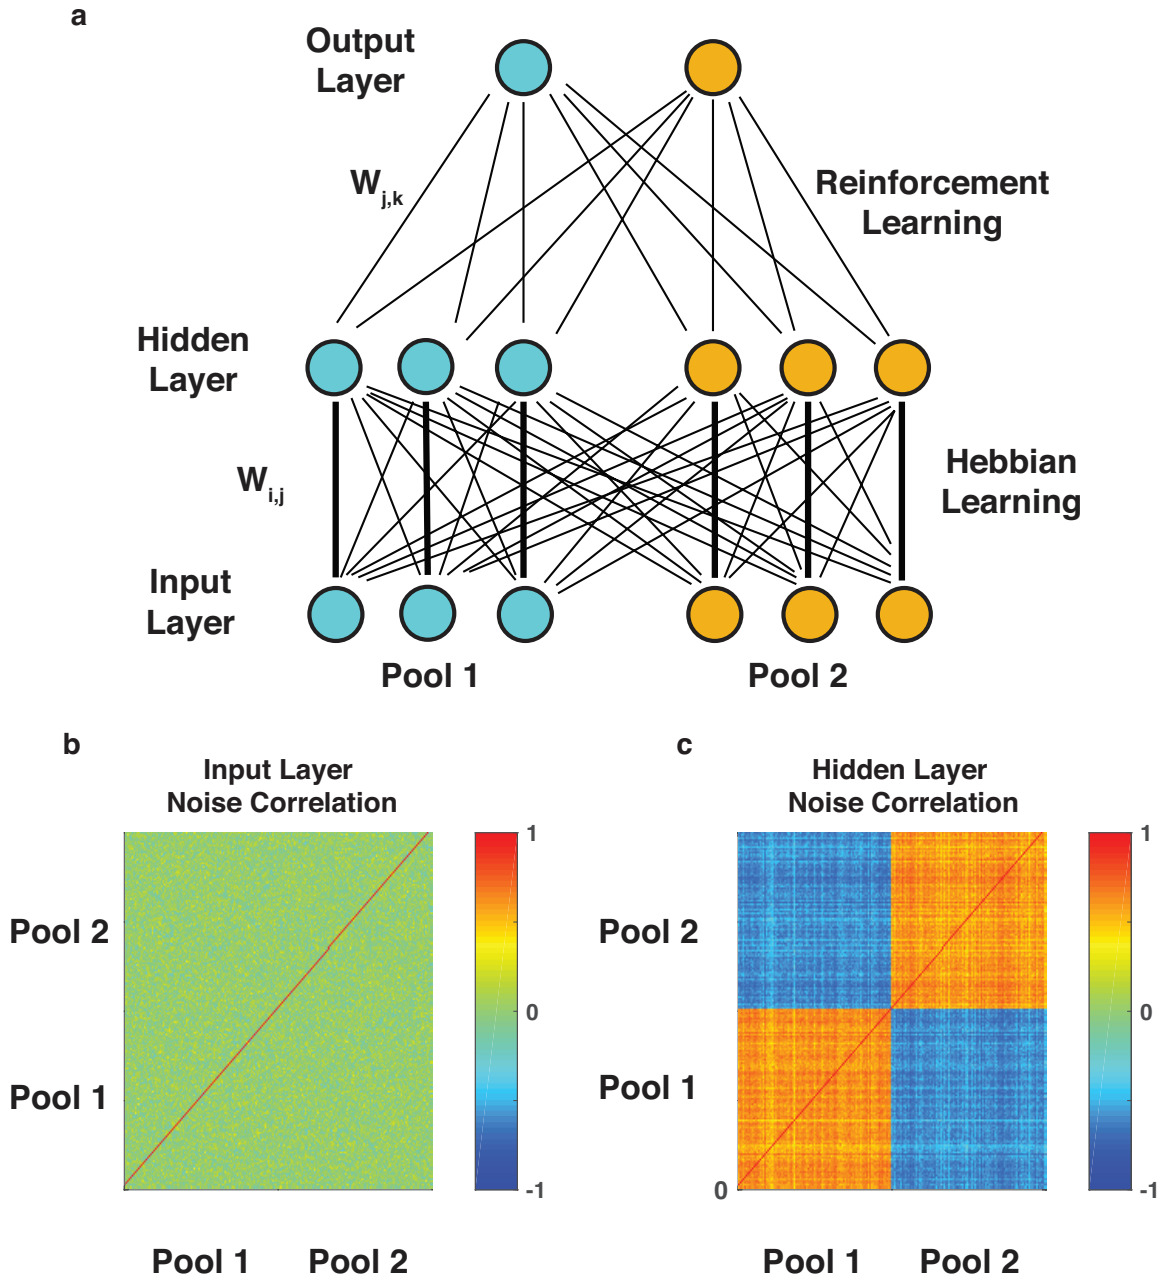

444  
445  
446  
447  
448  
449  
450  
451  
452  
453  
454  
455  
456  
457

**Figure 4: Hebbian learning produces correlations within similarly tuned populations in a perceptual discrimination task.** **A)** Three-layer neural network architecture. Input layer feeds forward to hidden layer, which is fully connected to an output layer. Input layer provides uncorrelated inputs to hidden layer through projection weights that are adjusted according to a Hebbian learning rule. **B&C)** Noise correlations observed in hidden layer units at the beginning (**B**) and end (**C**) of training.



458

459 In order to understand how noise correlations might impact learning in mixed  
460 encoding populations, we extended our perceptual discrimination task to include  
461 two directions of motion discrimination (eg. up/down and left/right). On each trial,  
462 a cue indicated which of two possible motion discriminations should be  
463 performed (figure 5A, left; (Cohen and Newsome, 2008)). We extended our  
464 neural network to include four populations of one hundred input units, each  
465 population encoding a conjunction of motion directions (up-right, up-left, down-  
466 right, down-left; figure 5A; input layer). Two additional inputs provided a perfectly  
467 reliable “cue” regarding the relevant feature for the trial (figure 5A; task units).  
468 Four output neurons encoded the four possible responses (up, left, down, right)  
469 and were fully connected to the input layer (figure 5A; output layer). Task units  
470 were hard wired to eliminate irrelevant task responses, but weights of input units  
471 were learned over time as in our previous simulations.

472

473 Learning performance in the two-feature discrimination task depended not only  
474 on the level of noise correlations, but also on the type. As in the previous  
475 simulation, adding noise correlations to each individual population of identically  
476 tuned units led to faster learning of the appropriate readout (Figure 5B&C,  
477 compare blue and yellow; Figure 5D&E, vertical axis; mean[std] accuracy across  
478 training: 0.53[0.05] and 0.614[0.08] for minimum (0) and maximum (0.2) in pool  
479 correlations, t-test for difference in accuracy:  $t = 95$ ,  $dof = 19998$ ,  $p < 10e-50$ ).

480

481 However, the more complex task design also allowed us to test whether dynamic  
482 trial-to-trial correlations might further facilitate learning. Specifically, correlations  
483 that increase shared variability among units that contribute evidence to the same  
484 response have been observed previously (Cohen and Newsome, 2008), and  
485 could in principle focus learning on relevant dimensions (figure 2C&D) even when  
486 those dimensions change from trial to trial. Indeed, adding correlations among  
487 separate pools that share the same encoding of the relevant feature (eg. UP on a  
488 vertical trial) led to faster learning (figure 5B; mean[std] training accuracy for  
489 model with relevant pool correlations: 0.64[0.09], t-test for difference from in pool  
490 correlation only model:  $t = 22$ ,  $dof = 19998$ ,  $p < 10e-50$ ) and weights that more  
491 closely approached the optimal readout (figure 5E, horizontal axis). In contrast,  
492 when positive noise correlations were introduced across separate encoding pools  
493 that shared the same tuning for the irrelevant dimension on each trial (eg. UP on  
494 a horizontal trial) learning was impaired dramatically (figure 5C; mean[std]  
495 training accuracy for model with irrelevant pool correlations: 0.51[0.05], t-test for  
496 difference from in pool correlation only model:  $t = -112$ ,  $dof = 19998$ ,  $p < 10e-50$ )  
497 and learned weights diverged from the optimal readout (figure 5F, horizontal  
498 axis). Model performance differences were completely attributable to learning the  
499 readout, as all models performed similarly when using the optimal readout (figure  
500 S1).

501

502 In order to test the idea that noise correlations might focus learning onto relevant  
503 dimensions, we extracted weight updates from each trial and projected these  
504 updates into a two-dimensional space where the first dimension captured the  
505 relative sensitivity to leftward versus rightward motion and the second dimension  
506 captured relative sensitivity to upward versus downward motion. In the model  
507 where input units were only correlated within their identically tuned pool, weight  
508 updates projected in all directions more or less uniformly (figure 5G), and did not  
509 differ systematically across trial types (vertical versus horizontal). However,  
510 dynamic noise correlations that shared variability across the relevant dimension  
511 tended to push weight updates onto the appropriate dimension for a given trial  
512 (figure 4F; *t*-test for difference in the magnitude of updating in up/down and  
513 left/right dimensions across conditions [up/down – left/right]:  $t = 3.4$ ,  $df=98$ ,  $p =$   
514  $0.001$ ). In contrast, dynamic noise correlations that shared variability across the  
515 irrelevant dimension tended to push weight updates onto the wrong dimension  
516 (figure 4H; *t*-test for difference in the magnitude of updating in up/down and  
517 left/right dimensions across conditions [up/down – left/right]:  $t = -9.5$ ,  $df=98$ ,  $p =$   
518  $10e-14$ ). Both of these trends were consistent across simulations, providing an  
519 explanation for the performance improvements achieved by relevant noise  
520 correlations (projection of learning onto an appropriate dimension) and  
521 performance impairments produced by irrelevant noise correlations (projection of  
522 learning onto an inappropriate dimension).

523  
524  
525  
526  
527  
528  
529  
530

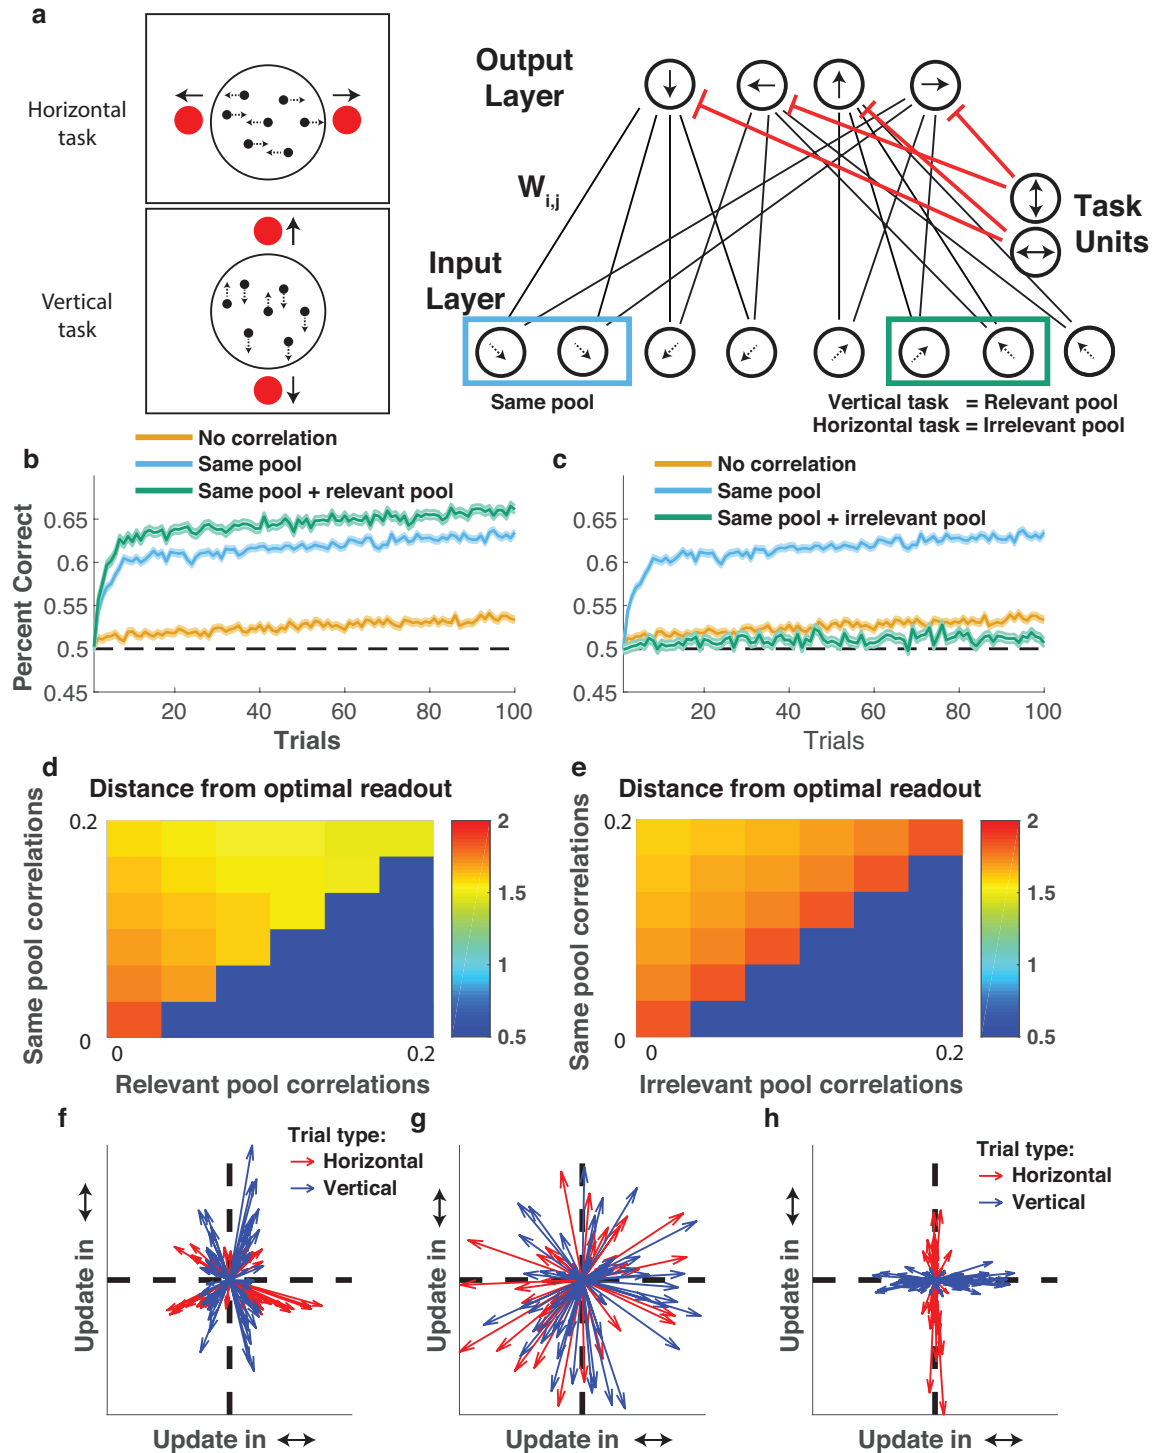

531  
532  
533  
534  
535  
536  
537  
538  
539

**Figure 5: Task dependent noise correlations affect learning speed by projecting learning onto specific feature dimensions.** **A)** A neural network was trained to perform two interleaved motion discrimination tasks (left; (Cohen and Newsome, 2008)). Network schematic (right) depicts two-layer feed-forward network in which each population of input units represents two dimensions of motion (up versus down, and left versus right), and output units produce responses in favor of alternative actions (up, down, left, right). Two additional input units provide cue

540 information that biases output units to produce an output corresponding to the discrimination  
541 appropriate on this trial (eg. horizontal or vertical). Noise correlations were manipulated among 1)  
542 identically tuned neurons (blue rectangle; same pool), 2) neurons that have similar encoding of  
543 the task relevant feature (green rectangle pair in vertical trials; relevant pool), and 3) neurons that  
544 have similar encoding of the task irrelevant feature (green rectangle pair in horizontal trials;  
545 irrelevant pool). **B&C**) Learning curves showing accuracy (ordinate) over trials (abscissa) for  
546 models 1) lacking noise correlations (orange), 2) containing noise correlations that are limited to  
547 neurons that have same tuning for both features (same pool; blue), 3) containing same pool noise  
548 correlations along with correlations between neurons in different pools that have the same tuning  
549 for the task-relevant feature (in pool+rel pool; green in **B**), and 4) containing in-pool noise  
550 correlations along with correlations between neurons in different pools that have the same tuning  
551 for the task irrelevant feature (in pool+irrel pool; green in **C**). **D&E**) Distance between learned  
552 weights and the optimal readout (color) for models that differ in their level of “in pool” correlations  
553 (ordinate, both plots), “relevant pool” correlations (abscissa, **D**), and “irrelevant pool” correlations  
554 (abscissa, **E**). **F,G,H**) Weight updates for example learning sessions were projected into a two  
555 dimensional space in which net updates to the relative contribution of vertical motion information  
556 (eg. up versus down) is represented on the abscissa and updates to the relative contribution of  
557 horizontal motion information (eg. left versus right) is represented on the ordinate. Arrows reflect  
558 single trial weight updates and are colored according to the trial type (red = horizontal  
559 discrimination, blue = vertical discrimination). Weight updates for a model with only “in pool”  
560 correlations look similar across trial types (**G**), but weight updates for a model with “relevant pool”  
561 correlations indicate more weight updating on the relevant feature (**F**), whereas the opposite was  
562 observed in the case of “irrelevant pool” correlations (**H**).  
563  
564

## 565 **Discussion:**

566  
567 Taken together, our results suggest that in settings where the population signal-  
568 to-noise ratio is limited by external factors (eg. inputs) and relevant task  
569 representations are low dimensional, noise correlations can make learning faster  
570 and more robust by focusing learning on the most relevant dimensions. We  
571 demonstrate this basic principle in a simple perceptual learning task (figure 3),  
572 where beneficial noise correlations between similarly tuned units could be  
573 produced through a simple Hebbian learning rule (figure 4). We extended our  
574 framework to a contextual learning task to demonstrate that dynamic noise  
575 correlations that bind task relevant feature representations facilitate faster  
576 learning (figure 5b&d) by pushing learning onto task-relevant dimensions (figure  
577 5f). Given the pervasiveness of noise correlations among similarly tuned sensory  
578 neurons (Zohary et al., 1994; Maynard et al., 1999; Bair et al., 2001; Averbek  
579 and Lee, 2003; Cohen and Maunsell, 2009; Huang and Lisberger, 2009; Ecker et  
580 al., 2010; Gu et al., 2011; Adibi et al., 2013), and that the noise correlations  
581 dynamics beneficial for learning in our simulations are similar to those that have  
582 been observed *in vivo* (Cohen and Newsome, 2008), we interpret our results as  
583 suggesting that noise correlations between similarly tuned neurons are a feature  
584 of neural coding architectures that ensures efficient readout learning, rather than  
585 a bug that limits encoding potential.  
586  
587

588 This interpretation rests on several assumptions in our model. Of particular  
589 importance is the assumption that signal-to-noise ratio of our populations is fixed,  
590 meaning that our manipulation of noise correlations can focus variance on  
591 specific dimensions without gaining or losing information. This assumption  
592 reflects conditions in which information is limited at the level of the inputs to the  
593 population, for instance due to noisy peripheral sensors (Beck et al., 2012;  
594 Kanitscheider et al., 2015). In such conditions, even with optimal encoding,  
595 population information saturates at an upper bound determined by the  
596 information available in the inputs to the population. Therefore, fixing the signal-  
597 to-noise ratio enabled us to examine the effect of noise correlations on  
598 downstream processes that learn to read-out the population code in the absence  
599 of any influence of noise correlations on the quantity of information contained  
600 within that population code.

601  
602 Previous theoretical work exploring the role of noise correlations in encoding has  
603 typically assumed that single neurons have a fixed variance, such that tilting the  
604 covariance of neural populations towards or away from the dimension of signal  
605 encoding would have a large impact on the amount of information that can be  
606 encoded by a population (figure 1a; (Averbeck et al., 2006; Moreno-Bote et al.,  
607 2014)). Such assumptions lead to the idea that positive noise correlations among  
608 similarly tuned neurons limit encoding potential, raising the question of why they  
609 are so common in the brain (Cohen and Kohn, 2011). In considering the  
610 implications of this framework, one important question is: if information encoded  
611 by the population can be increased by changing the correlation structure among  
612 neurons, where does this additional information come from? In some cases, the  
613 neural population in question may indeed receive sufficient task relevant  
614 information from upstream brain regions to reorganize its encoding in this way,  
615 but in other cases it is likely that information is limited by the inputs to a neural  
616 population (Kanitscheider et al., 2015; Kohn et al., 2016). In cases where  
617 incoming information is limited, further increasing representational capacity is not  
618 possible, and formatting information for efficient readout is essentially the best  
619 that the population code could do. Here we show that the noise correlations that  
620 have previously been described as “information limiting” are exactly the type of  
621 correlations that format information most efficiently for readout learning under  
622 such conditions.

623  
624 Jointly considering these antagonistic perspectives on noise correlations provides  
625 a more nuanced view of how neural representations are likely optimized for  
626 learning. In order to optimize an objective function, a neural population can  
627 reduce correlated noise in task relevant dimensions to increase its  
628 representational capacity up to some level constrained by its inputs (Figure 6,  
629 left). But once the population is fully representing all task relevant information that  
630 has been provided to it, it can additionally optimize representations by pushing as  
631 much variance onto task relevant dimensions as possible, thereby affording

632 efficient learning in downstream neural populations (Figure 6, right). In short,  
633 optimization of a neural population code does not occur in a vacuum, and instead  
634 depends critically on both upstream (eg. input constraints) and downstream (eg.  
635 readout) neural populations (Figure 6). In this view, if a neural population is *not*  
636 fully representing the decision relevant information made available to it, then  
637 learning could improve the efficiency of representations by reducing rate limiting  
638 noise correlations as has been observed in some paradigms (Figure 6, left; Gu et  
639 al., 2011; Ni et al., 2018). In contrast, once available information is fully  
640 represented, readout learning could be further optimized by reformatting  
641 population codes such that variability is shared across neurons with similar  
642 tuning for the relevant task feature, producing the sorts of dynamic noise  
643 correlations that have been observed in well trained animals (Figure 6, right;  
644 Cohen and Newsome, 2008).

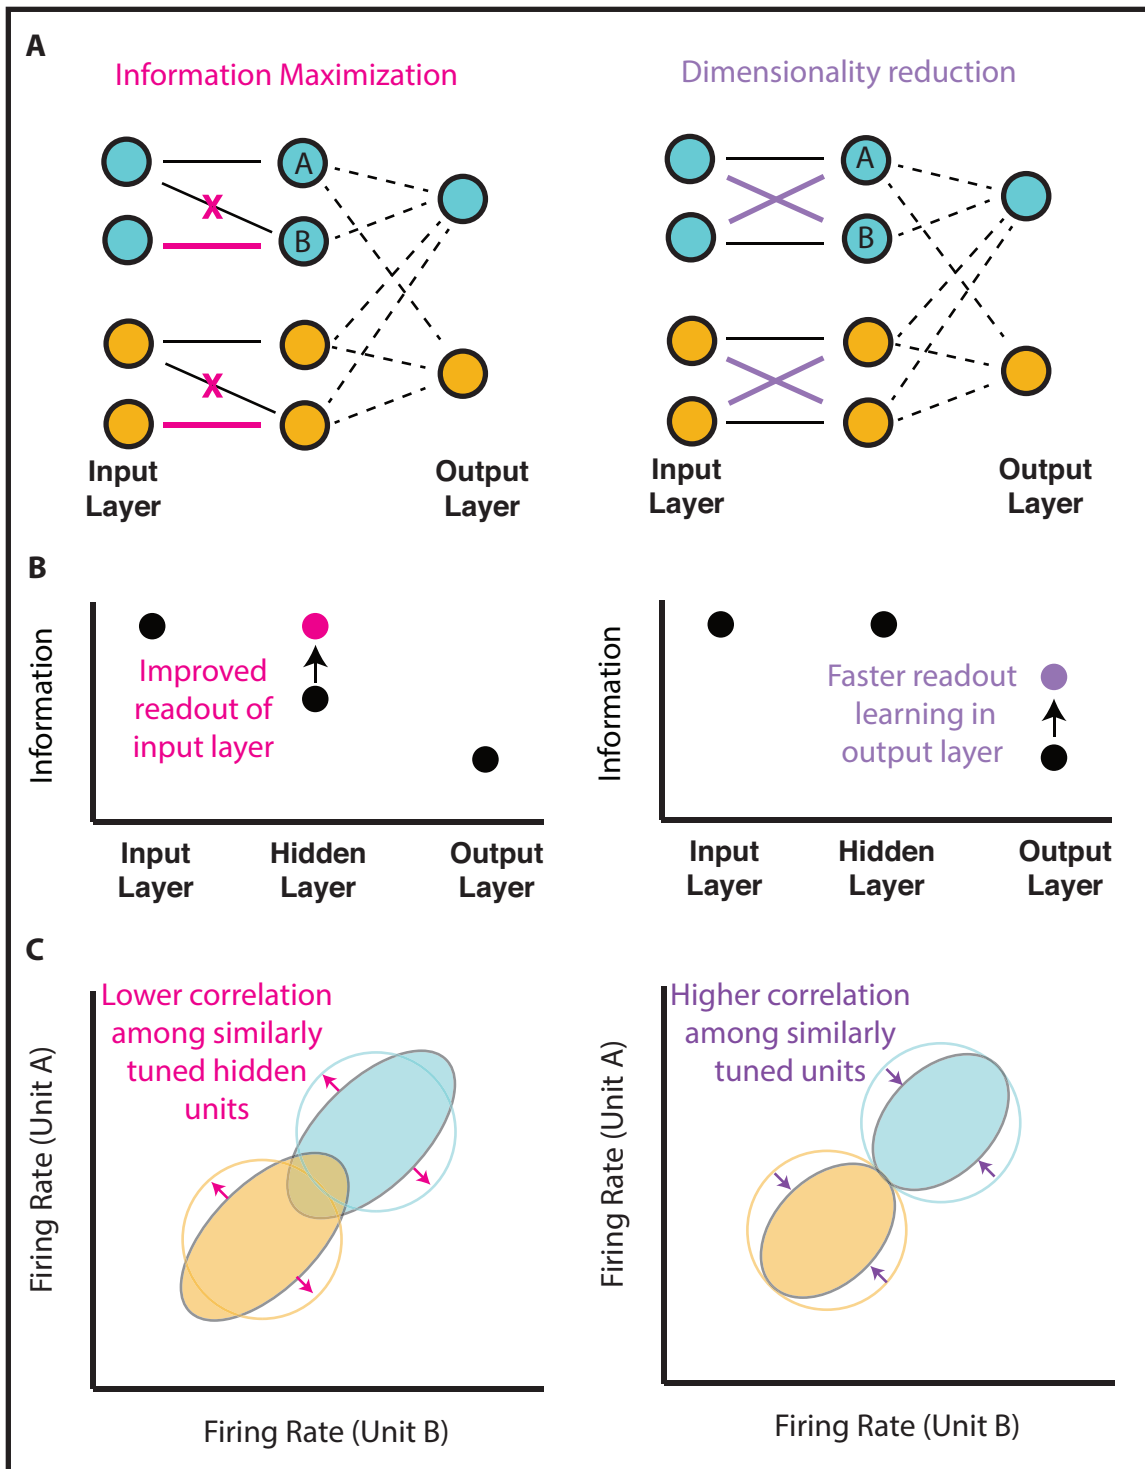

645  
 646 **Figure 6: Information maximization and dimensionality reduction can be useful for**  
 647 **learning under different situations and have opposite effects on noise correlations among**  
 648 **similarly tuned units. A)** A schematic representation of a three layer neural network in which  
 649 units provide evidence for one of two categorizations (blue/orange). In the left network, the hidden  
 650 layer initially has access to information from only one of two independent units in each pool, but  
 651 weights are subsequently adjusted to increase task-relevant information represented in the  
 652 hidden layer (pink). In the right network, the hidden layer initially has access to all task-relevant



653 information, but weights are subsequently adjusted to share signal and noise across similarly  
654 tuned units to afford dimensionality reduction (purple). Note that the information maximizing  
655 weight adjustments (left, pink) increase signal-to-noise ratio in the hidden layer but preserve the  
656 variance in firing rate of individual neurons, whereas the dimensionality reducing weight  
657 adjustments (right, purple) maintain a fixed signal-to-noise ratio in hidden units, but decrease the  
658 variance of individual units by averaging across multiple similarly tuned inputs. Dashed lines to  
659 output units reflect weights that need to be learned based on feedback. **B)** Task relevant  
660 information (mutual information between unit activations and stimulus category; abscissa) is  
661 depicted for each layer (ordinate). Weight adjustments affording information maximization (left)  
662 increase task relevant information in the hidden layer (pink), whereas weight adjustments that  
663 afford dimensionality reduction (right) do not affect task-relevant information in the hidden layer  
664 itself but instead increase the rate of learning in the output layer, thereby leading to more task-  
665 relevant information in the output layer (purple). **C)** Weight adjustments for information  
666 maximization (pink in panel A) *decrease* correlations among hidden units A&B by removing  
667 shared input from a single input unit and instead providing independent sources of input to each  
668 unit (pink arrows). In contrast, weight adjustments for dimensionality reduction *increase* noise  
669 correlations among hidden units A&B by providing them with the same mixture of information from  
670 the two identically tuned input units. We propose that both of these processes play a critical role  
671 in learning and that changes in noise correlations across learning will depend critically on which  
672 process dominates. As shown in panel B, this will depend critically on whether the neural  
673 population in question has already fully represented information available from its inputs. In  
674 principle, these processes could occur serially, with early learning maximizing information  
675 available in intermediate layers (left) and later learning compressing that information into a format  
676 allowing rapid readout learning (right).

677  
678

679 In addition to key assumptions about an external limitation on signal-to-noise, our  
680 modeling included a number of simplifying assumptions that are unlikely to hold  
681 up in real neural populations. For example, we consider discrete pools of  
682 identically tuned neurons, rather than the heterogeneous populations observed in  
683 sensory cortical regions of the brain. A primary goal of our work was to identify  
684 the computational principles that control the speed at which readout can be  
685 learned, and our simplified populations are considerably more tractable and  
686 transparent than realistic neural populations. The principles that we identify here  
687 are certainly at play in real neural populations, albeit with implications that are far  
688 less transparent. We hope that our simplified results pave the way for future work  
689 to assess nuances that can emerge in mixed heterogeneous populations, or in  
690 more realistic architectures that go beyond the simple feed forward flow of  
691 information considered here.

692

### 693 *Model predictions*

694

695 Our work shows that noise correlations can focus the gradient of learning onto  
696 the most appropriate dimensions. Thus, our model predicts that the degree to  
697 which similarly tuned neurons are correlated during a perceptual discrimination  
698 should be positively related to performance improvements experienced on  
699 subsequent discriminations. In contrast, our model predicts that the degree of  
700 correlation between neurons that are similarly tuned to a task irrelevant feature  
701 should control the degree of learning on irrelevant dimensions, and thus

702 negatively relate to performance improvements on subsequent discriminations.  
703 These predictions are strongest for the earliest stages of learning where weight  
704 adjustments are critical for subsequent performance, but they may also hold for  
705 later stages of learning, when correlations on irrelevant dimensions, including  
706 independent noise channels, could potentially lead to systematic deviations from  
707 optimal readout (figure 2f, 4d&e). These predictions could be tested by recording  
708 neural responses to a stimulus set that differs across multiple features to  
709 characterize both signal-to-noise and correlated variability for each feature  
710 discrimination. A strong prediction of our model is that correlated variability within  
711 neurons tuned to a given feature should be a predictor of subsequent learning of  
712 responses to that feature – above and beyond feature value discriminability.

713  
714 One interesting special case involves tasks where the relevant dimension  
715 changes in an un signaled manner (Birrell and Brown, 2000). In such tasks, noise  
716 correlations on the previously relevant dimension would, after such an  
717 “extradimensional shift”, force gradients into a task-irrelevant dimension and thus  
718 impair learning performance. Interestingly, learning after extra-dimensional shifts  
719 can be selectively improved by enhancing noradrenergic signaling (Devauges  
720 and Sara, 1990; Lapiz and Morilak, 2006), which leads to increased arousal  
721 (Joshi et al., 2016; Reimer et al., 2016) and decreased cortical pairwise noise  
722 correlations in sensory and higher order cortex (Vinck et al., 2015; Joshi and  
723 Gold, n.d.). While these observations have been made in different paradigms, our  
724 model suggests that the reduction of noise correlations resulting from increased  
725 sustained levels of norepinephrine after an extradimensional shift (Bouret and  
726 Sara, 2005) could mediate faster learning by expanding the dimensionality of the  
727 learning gradients (compare figure 5G to 5F) to consider features that have not  
728 been task-relevant in the past.

729  
730 *Relation to attentional effects on noise correlations*

731  
732 In broad strokes, our finding that manipulation of noise correlations can focus  
733 variance on specific dimensions is in line with specific models of attention. In  
734 particular, noise reduction in task irrelevant dimensions might be considered in  
735 the same light that is often cast on suppression of task irrelevant dimensions by  
736 attentional mechanisms (Zanto and Gazzaley, 2009), in particular for purposes of  
737 accurate credit assignment (Akaishi et al., 2016; Leong et al., 2017). One  
738 possibility is that compressed low-dimensional task representations in higher-  
739 order decision regions (Mack et al., 2019) may pass accumulated decision  
740 related information back to sensory regions in order to approximate Bayesian  
741 inference (Haefner et al., 2016; Bondy et al., 2018; Lange et al., 2018). As task  
742 relevant features are learned, such a process would promote noise correlations  
743 between neurons coding those relevant features. In other words, noise  
744 correlations may reflect a chosen hypothesis about which feature is relevant for  
745 predicting outcomes. Such a signal would be beneficial if it could persist (and

746 thus preserve correlations between neurons tuned to the same task relevant  
747 feature value) until the time of feedback or reinforcement. Recent work showing  
748 strengthened noise correlations between similarly tuned neurons during working  
749 memory maintenance suggests that this might very well be the case (Merrikhi et  
750 al., 2018).

751  
752 One observation that seems at odds with this interpretation is that manipulations  
753 of attention that cue a particular location or feature tend to decrease noise  
754 correlations among neurons that encode that location or feature (Cohen and  
755 Maunsell, 2009; Mitchell et al., 2009; Cohen and Maunsell, 2011; Herrero et al.,  
756 2013; Doiron et al., 2016). The effects of attentional cuing on noise correlations  
757 are dynamic in that cues change from one trial to the next, and contextual, in that  
758 noise correlations are reduced most dramatically among neurons that contribute  
759 evidence toward the same response in a manner consistent with increasing the  
760 amount of task relevant information in the population code (Ruff and Cohen,  
761 2014; Downer et al., 2015). Our model does not account for these attentional  
762 effects, as we intentionally constrained the signal-to-noise ratio of our neural  
763 populations, thereby eliminating any potential changes in information encoding  
764 potential. However, we hope that our work motivates future studies to jointly  
765 consider the impacts of noise correlations on both learning and immediate  
766 performance in order to better understand the potentially competing imperatives  
767 that the brain faces in dynamically controlling the correlation structure of its own  
768 representations (see (Haimerl et al., 2019) for one attempt to do so).

769  
770

### 771 *Origins of useful noise correlations*

772

773 One important question stemming from our work is how noise correlations  
774 emerge in the brain. This question has been one of longstanding debate, largely  
775 because there are so many potential mechanisms through which correlations  
776 could emerge (Kanitscheider et al., 2015; Kohn et al., 2016). Noise correlations  
777 could emerge from convergent and divergent feed forward wiring (Shadlen and  
778 Newsome, 1998), local connectivity patterns within a neural population (Hansen  
779 et al., 2012; Smith et al., 2013), or top down inputs provided separately to  
780 different neural populations (Haefner et al., 2016). Here we show that static noise  
781 correlations that are useful for perceptual learning emerge naturally from Hebbian  
782 learning in a feed-forward network. While this certainly suggests that useful noise  
783 correlations could emerge through feed forward wiring, it is also possible to  
784 consider our Hebbian learning as occurring in a one-step recurrence of the input  
785 units, and thus the same data support the possibility of noise correlations through  
786 local recurrence. The context dependent noise correlations that speed learning  
787 (figure 4), however, would not arise through simple Hebbian learning. Such  
788 correlations could potentially be produced through selective top-down signals  
789 from the choice neurons, as has been previously proposed (Wimmer et al., 2015;

790 Haefner et al., 2016; Bondy et al., 2018; Lange et al., 2018). Moreover, top-down  
791 input may selectively target neuronal ensembles produced through Hebbian  
792 learning (Collins and Frank, 2013). While previous work has suggested that such  
793 a mechanism could be adaptive for accumulating information over the course of a  
794 decision (Haefner et al., 2016), our work demonstrates that the same mechanism  
795 could effectively be used to tag relevant neurons for weight updating between  
796 trials, making efficient use of top-down circuitry. Haimerl et al. recently made a  
797 similar point, showing that stochastic modulatory signals shared across task-  
798 informative neurons can serve to tag them for a decoder (Haimerl et al., 2019).

799

### 800 *Noise correlations as inductive biases*

801

802 Artificial intelligence has undergone a revolution over the past decade leading to  
803 human level performance in a wide range of tasks (Mnih et al., 2015). However, a  
804 major issue for modern artificial intelligence systems, which build heavily on  
805 neural network architectures, is that they require far more training examples than  
806 a biological system would (Hassabis et al., 2017). This biological advantage  
807 occurs despite the fact that the total number of synapses in the human brain,  
808 which could be thought of as the free parameters in our learning architecture, is  
809 much greater than the number of weights in even the most parameter-heavy  
810 deep learning architectures. Our work provides some insight into why this occurs;  
811 correlated variability across neurons in the brain constrain learning to specific  
812 dimensions, thereby limiting the effective complexity of the learning problem  
813 (figure 5F-G). We show that, for simple tasks, this can be achieved using  
814 Hebbian learning rules (figure 4), but that contextual noise correlations, of the  
815 form that might be produced through top-down signals (Haefner et al., 2016), are  
816 critical for appropriately focusing learning in more complex circumstances. In  
817 principle, algorithms that effectively learn and implement noise correlations might  
818 reduce the amount of data needed to train AI systems by limiting degrees of  
819 freedom to those dimensions that are most relevant. Furthermore, our work  
820 suggests that large scale neural recordings in early stages of learning complex  
821 tasks might serve as indicators of the inductive biases that constrain learning in  
822 biological systems.

823

824 In summary, we show that under external constraints of task-relevant information,  
825 noise correlations that have previously been called “rate limiting” can serve an  
826 important role in constraining learning to task-relevant dimensions. In the context  
827 of previous theory focusing on representation, our work suggests that neural  
828 populations are subject to competing forces when optimizing covariance  
829 structures; on one hand reducing correlations between pairs of similarly tuned  
830 neurons can be helpful to fully represent available information, but increasing  
831 correlations among similarly tuned neurons can be helpful for assigning credit to  
832 task relevant features. We believe that this view of the learning process not only  
833 provides insight to understanding the role of noise correlations in the brain, but

834 opens up the door to better understand the inductive biases that guide learning in  
835 biological systems.

836

837

838 Supplementary figures:

839

840

841

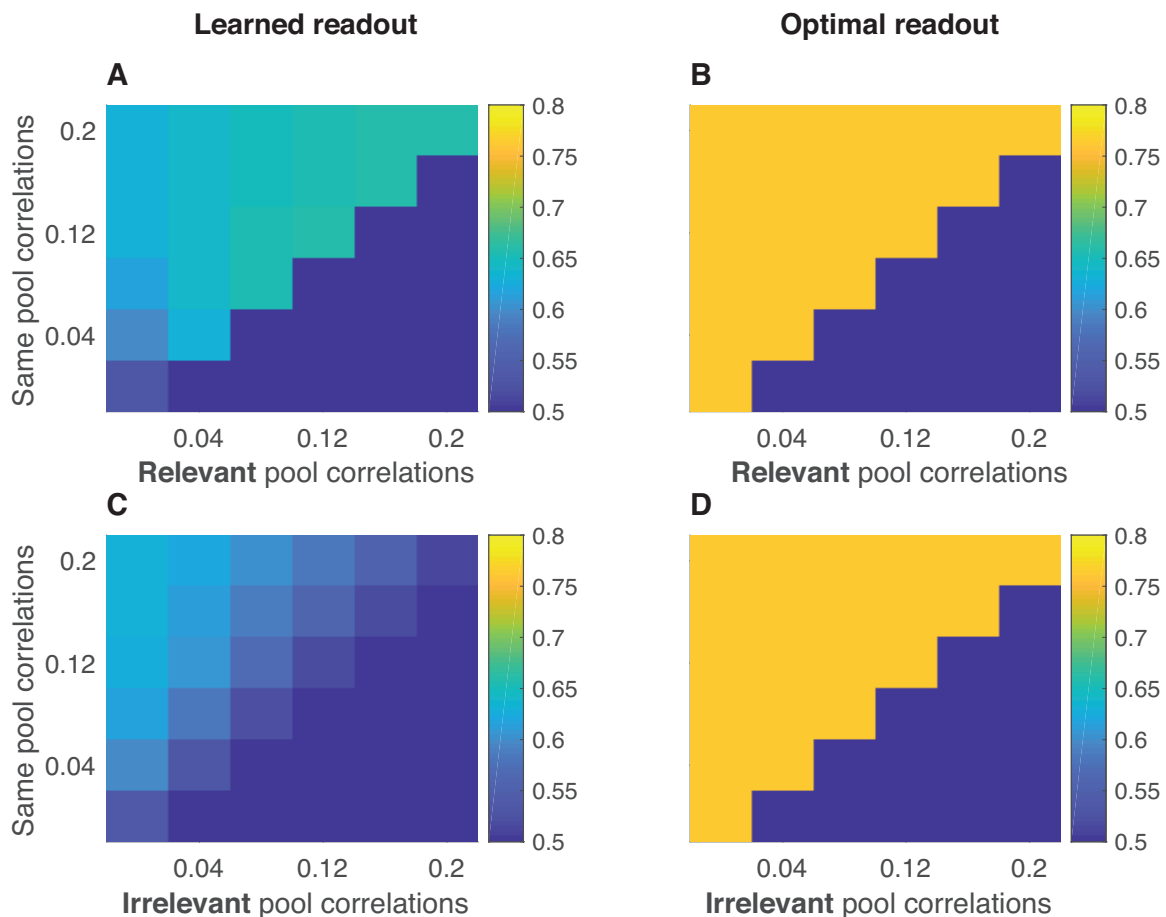

842

843

844

845 **Figure S1: Noise correlations affect speed of learning, but not performance using optimal**

846 **readout in multiple discrimination task. A) Mean test accuracy (color) of all models spanning**

847 **the range of in pool correlations (abscissa) and relevant pool correlations (ordinate). B) Mean**

848 **accuracy of same models using optimal readout, rather than the learned readout. C) Mean**

849 **test accuracy (color) of all models spanning the range of in pool correlations (abscissa) and**

850 **irrelevant pool correlations (ordinate). D) Mean accuracy of same models using optimal, rather than**

851 **the learned readout. Note that performance of all models is identical when readout is optimal,**

852 **rather than learned.**

853

854

855

856

- 857 Adibi M, McDonald JS, Clifford CWG, Arabzadeh E (2013) Adaptation improves  
858 neural coding efficiency despite increasing correlations in variability. *Journal*  
859 *of Neuroscience* 33:2108–2120.
- 860 Akaishi R, Kolling N, Brown JW, Rushworth M (2016) Neural Mechanisms of  
861 Credit Assignment in a Multicue Environment. *Journal of Neuroscience*  
862 36:1096–1112.
- 863 Averbeck BB, Latham PE, Pouget A (2006) Neural correlations, population  
864 coding and computation. *Nature Reviews Neuroscience* 7:358–366.
- 865 Averbeck BB, Lee D (2003) Neural noise and movement-related codes in the  
866 macaque supplementary motor area. *Journal of Neuroscience* 23:7630–7641.
- 867 Bair W, Zohary E, Newsome WT (2001) Correlated firing in macaque visual area  
868 MT: time scales and relationship to behavior. *Journal of Neuroscience*  
869 21:1676–1697.
- 870 Beck JM, Ma WJ, Pitkow X, Latham PE, Pouget A (2012) Perspective. *Neuron*  
871 74:30–39.
- 872 Birrell JM, Brown VJ (2000) Medial frontal cortex mediates perceptual attentional  
873 set shifting in the rat. *Journal of Neuroscience* 20:4320–4324.
- 874 Bondy AG, Haefner RM, Cumming BG (2018) Feedback determines the structure  
875 of correlated variability in primary visual cortex. *Nature Publishing Group*:1–  
876 15.
- 877 Bouret S, Sara SJ (2005) Network reset: a simplified overarching theory of locus  
878 coeruleus noradrenaline function. *Trends in Neurosciences* 28:574–582.
- 879 Cohen MR, Kohn A (2011) Measuring and interpreting neuronal correlations.  
880 *Nature Publishing Group* 14:811–819.
- 881 Cohen MR, Maunsell JHR (2009) Attention improves performance primarily by  
882 reducing interneuronal correlations. *Nature Publishing Group* 12:1594–1600.
- 883 Cohen MR, Maunsell JHR (2011) Using neuronal populations to study the  
884 mechanisms underlying spatial and feature attention. *Neuron* 70:1192–1204.
- 885 Cohen MR, Newsome WT (2008) Context-Dependent Changes in Functional  
886 Circuitry in Visual Area MT. *Neuron* 60:162–173.
- 887 Collins AGE, Frank MJ (2013) Cognitive control over learning: creating,  
888 clustering, and generalizing task-set structure. *Psychological Review*  
889 120:190–229.



- 890 Devauges V, Sara SJ (1990) Activation of the noradrenergic system facilitates an  
891 attentional shift in the rat. *Behavioural Brain Research* 39:19–28.
- 892 Doiron B, Litwin-Kumar A, Rosenbaum R, Ocker GK, Josić K (2016) The  
893 mechanics of state-dependent neural correlations. *Nature Publishing Group*  
894 19:383–393.
- 895 Downer JD, Niwa M, Sutter ML (2015) Task engagement selectively modulates  
896 neural correlations in primary auditory cortex. *Journal of Neuroscience*  
897 35:7565–7574.
- 898 Ecker AS, Berens P, Keliris GA, Bethge M, Logothetis NK, Tolias AS (2010)  
899 Decorrelated neuronal firing in cortical microcircuits. *Science* 327:584–587.
- 900 Gu Y, Liu S, Fetsch CR, Yang Y, Fok S, Sunkara A, DeAngelis GC, Angelaki DE  
901 (2011) Perceptual learning reduces interneuronal correlations in macaque  
902 visual cortex. *Neuron* 71:750–761.
- 903 Haefner RM, Pietro Berkes, Fiser J (2016) Perceptual Decision-Making as  
904 Probabilistic Inference by Neural Sampling. *Neuron* 90:649–660.
- 905 Haimerl C, Savin C, Simoncelli EP (2019) Flexible and accurate decoding of  
906 neural populations through stochastic comodulation. *Biorxiv* 21:598.
- 907 Hansen BJ, Chelaru MI, Dragoi V (2012) Correlated variability in laminar cortical  
908 circuits. *Neuron* 76:590–602.
- 909 Hassabis D, Kumaran D, Summerfield C, Botvinick M (2017) Neuroscience-  
910 Inspired Artificial Intelligence. *Neuron* 95:245–258.
- 911 Hawkey DJC, Amitay S, Moore DR (2004) Early and rapid perceptual learning.  
912 *Nature Publishing Group* 7:1055–1056.
- 913 Herrero JL, Gieselmann MA, Sanayei M, Thiele A (2013) Attention-induced  
914 variance and noise correlation reduction in macaque V1 is mediated by  
915 NMDA receptors. *Neuron* 78:729–739.
- 916 Huang X, Lisberger SG (2009) Noise correlations in cortical area MT and their  
917 potential impact on trial-by-trial variation in the direction and speed of  
918 smooth-pursuit eye movements. *Journal of Neurophysiology* 101:3012–3030.
- 919 Joshi S, Gold JI (n.d.) Context-Dependent Relationships between Locus  
920 Coeruleus Firing Patterns and Coordinated Neural Activity in the Anterior  
921 Cingulate Cortex. *Biorxiv*.
- 922 Joshi S, Li Y, Kalwani RM, Gold JI (2016) Relationships between Pupil Diameter  
923 and Neuronal Activity in the Locus Coeruleus, Colliculi, and Cingulate Cortex.



- 924        Neuron 89:221–234.
- 925        Kanitscheider I, Coen-Cagli R, Pouget A (2015) Origin of information-limiting  
926        noise correlations. *Proceedings of the National Academy of Sciences*  
927        112:E6973–E6982.
- 928        Kohn A, Coen-Cagli R, Kanitscheider I, Pouget A (2016) Correlations and  
929        Neuronal Population Information. *Annu Rev Neurosci* 39:237–256.
- 930        Krotov D, Hopfield JJ (2019) Unsupervised learning by competing hidden units.  
931        *Proceedings of the National Academy of Sciences* 116:7723–7731.
- 932        Lange RD, Chatteraj A, Beck JM, Yates JL, Haefner RM (2018) A confirmation  
933        bias in perceptual decision-making due to hierarchical approximate inference.  
934        *Biorxiv*.
- 935        Lapid M, Morilak DA (2006) Noradrenergic modulation of cognitive function in  
936        rat medial prefrontal cortex as measured by attentional set shifting capability.  
937        *Neuroscience* 137:1039–1049.
- 938        Law C-T, Gold JI (2009) Reinforcement learning can account for associative and  
939        perceptual learning on a visual-decision task. *Nature Neuroscience* 12:655–  
940        663.
- 941        Leong YC, Radulescu A, Daniel R, DeWoskin V, Niv Y (2017) Dynamic  
942        Interaction between Reinforcement Learning and Attention in  
943        Multidimensional Environments. *Neuron* 93:451–463.
- 944        Mack ML, Preston AR, Love BC (2019) Ventromedial prefrontal cortex  
945        compression during concept learning. *Nature Communications*:1–11.
- 946        Maynard EM, Hatsopoulos NG, Ojakangas CL, Acuna BD, Sanes JN, Normann  
947        RA, Donoghue JP (1999) Neuronal interactions improve cortical population  
948        coding of movement direction. *Journal of Neuroscience* 19:8083–8093.
- 949        Merrikhi Y, Clark K, Noudoost B (2018) Concurrent influence of top-down and  
950        bottom-up inputs on correlated activity of Macaque extrastriate neurons.  
951        *Nature Communications* 9:5393.
- 952        Mitchell JF, Sundberg KA, Reynolds JH (2009) Spatial attention decorrelates  
953        intrinsic activity fluctuations in macaque area V4. *Neuron* 63:879–888.
- 954        Mnih V, Kavukcuoglu K, Silver D, Rusu AA, Veness J, Bellemare MG, Graves A,  
955        Riedmiller M, Fidjeland AK, Ostrovski G, Petersen S, Beattie C, Sadik A,  
956        Antonoglou I, King H, Kumaran D, Wierstra D, Legg S, Hassabis D (2015)  
957        Human-level control through deep reinforcement learning. *Nature* 518:529–

- 958 533.
- 959 Moreno-Bote R, Beck J, Kanitscheider I, Pitkow X, Latham P, Pouget A (2014)  
960 Information-limiting correlations. *Nature Publishing Group* 17:1410–1417.
- 961 Ni AM, Ruff DA, Alberts JJ, Symmonds J, Cohen MR (2018) Learning and  
962 attention reveal a general relationship between population activity and  
963 behavior. *Science* 359:463–465.
- 964 Oja E (1982) Simplified neuron model as a principal component analyzer. *Journal*  
965 *of Mathematical Biology*:1–7.
- 966 Pouget A, Dayan P, Zemel R (2000) Information processing with population  
967 codes. *Nature Reviews Neuroscience* 1:125–132.
- 968 Reimer J, McGinley MJ, Liu Y, Rodenkirch C, Wang Q, McCormick DA, Tolias AS  
969 (2016) Pupil fluctuations track rapid changes in adrenergic and cholinergic  
970 activity in cortex. *Nature Communications* 7:13289.
- 971 Ruff DA, Cohen MR (2014) Attention can either increase or decrease spike count  
972 correlations in visual cortex. *Nature Publishing Group* 17:1591–1597.
- 973 Shadlen MN, Newsome WT (1998) The variable discharge of cortical neurons:  
974 implications for connectivity, computation, and information coding. *J Neurosci*  
975 18:3870–3896.
- 976 Smith MA, Jia X, Zandvakili A, Kohn A (2013) Laminar dependence of neuronal  
977 correlations in visual cortex. *Journal of Neurophysiology* 109:940–947.
- 978 Stringer C, Michaelos M, Pachitariu M (2019) High precision coding in mouse  
979 visual cortex. *Biorxiv*.
- 980 Tsividis P, Pouncy T, Xu JL, Tenenbaum JB, Gershman SJ (2017) Human  
981 Learning in Atari. 2017 AAAI Spring Symposium Series, *Science of*  
982 *Intelligence: Computational Principles of Natural and Artificial Intelligence*:1–  
983 4.
- 984 Vinck M, Batista-Brito R, Knoblich U, Cardin JA (2015) Arousal and Locomotion  
985 Make Distinct Contributions to Cortical Activity Patterns and Visual Encoding.  
986 *Neuron* 86:740–754.
- 987 Wimmer RD, Schmitt LI, Davidson TJ, Nakajima M, Deisseroth K, Halassa MM  
988 (2015) Thalamic control of sensory selection in divided attention. *Nature*  
989 526:705–709.
- 990 Zanto TP, Gazzaley A (2009) Neural Suppression of Irrelevant Information  
991 Underlies Optimal Working Memory Performance. *Journal of Neuroscience*

992 29:3059–3066.

993 Zohary E, Shadlen MN, Newsome WT (1994) Correlated neuronal discharge rate  
994 and its implications for psychophysical performance. *Nature* 370:140–143.

995
